# Supplementary material
Source: PubMed Central journal article supplement (PMC2805240)
Supplement: NIHMS161077-supplement-1_si_001.pdf [file NIHMS161077-supplement-1_si_001.pdf]

## Supporting Information for:

### Identification of Novel Non-Hydroxamate Anthrax Toxin Lethal Factor Inhibitors by Topomeric Searching, Docking and Scoring, and *In Vitro* Screening

Ting-Lan Chiu, Jonathan Solberg, Satish Patil, Todd W. Geders, Xia Zhang, Subhashree Rangarajan, Rawle Francis, Barry C. Finzel, Michael A. Walters, Derek J. Hook, and Elizabeth A. Amin

To be published in *J. Chem. Inf. Model.*

This supporting information was prepared on October 30, 2009 and consists of 22 pages.

| <u>Contents:</u>                                                                                                                                                                        | <i>page</i> |
|-----------------------------------------------------------------------------------------------------------------------------------------------------------------------------------------|-------------|
| Table S1. Seventeen matrix metalloproteinase inhibitors (MMPi)s found to be inactive against the anthrax toxin lethal factor, with total Surflex-Dock scores                            | S-2         |
| Table S2. <i>In vitro</i> assay data for the top five anthrax toxin LF inhibitor hit compounds <b>5426202</b> , <b>5421384</b> , <b>5428736</b> , <b>5426345</b> , and <b>150002740</b> | S-10        |
| Table S3. <i>In vitro</i> assay data for two matrix metalloproteinase inhibitors active against the anthrax toxin lethal factor: <b>GM6001</b> and <b>M444264</b>                       | S-14        |
| Table S4. Identity and purity analysis data for the top three anthrax toxin LF inhibitor hit compounds: <b>5426202</b> , <b>5421384</b> , and <b>5428736</b>                            | S-16        |

Table S1. Seventeen matrix metalloproteinase inhibitors (MMPIs) found to be inactive against the anthrax toxin lethal factor, with total Surflex-Dock scores.

| Compound                                                                                       | Total Surflex-Dock Score (-log $K_d$ ) |
|------------------------------------------------------------------------------------------------|----------------------------------------|
| 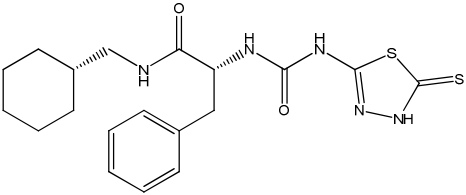<br>M444243   | 11.48                                  |
| <br>M364200  | 11.31                                  |
| <br>M444239 | 10.46                                  |

|                                                                                                   |      |
|---------------------------------------------------------------------------------------------------|------|
| 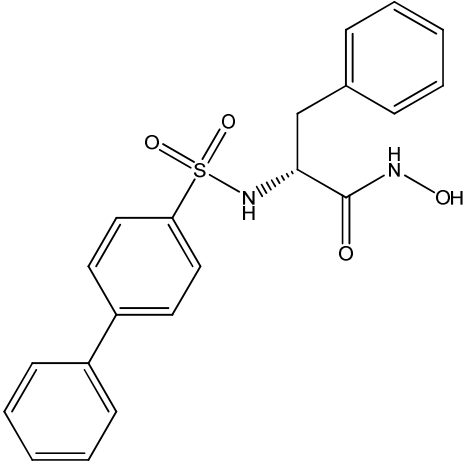 <p>M444249</p>  | 9.94 |
|  <p>M444247</p> | 9.82 |

|                                                                                                                                                                                                                                                                                                                                                                                                                                                                                                                                                                  |      |
|------------------------------------------------------------------------------------------------------------------------------------------------------------------------------------------------------------------------------------------------------------------------------------------------------------------------------------------------------------------------------------------------------------------------------------------------------------------------------------------------------------------------------------------------------------------|------|
| 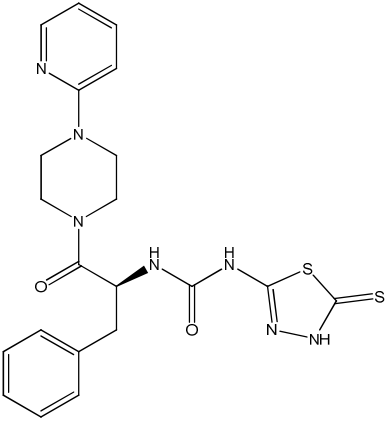 <p>Chemical structure of M444240: A benzyl group is attached to a chiral center (wedge bond) of a 2-oxoethylamine derivative. This chiral center is also bonded to a nitrogen atom which is part of a piperazine ring. The piperazine ring is further substituted with a pyridin-2-yl group. The nitrogen atom of the 2-oxoethylamine derivative is also bonded to a carbonyl group, which is further substituted with a 1,2,4-thiazole-5-yl group.</p>                        | 9.38 |
|  <p>Chemical structure of M364210: A complex bicyclic system consisting of a benzene ring fused to a six-membered ring containing a nitrogen atom and a carbonyl group. This system is linked via a carbonyl group to a chiral center (wedge bond) of a piperazine ring. The piperazine ring is further substituted with a methyl group (dashed bond) and a carbonyl group. The carbonyl group is further substituted with a methyl group (wedge bond) and an oxygen atom.</p> | 9.31 |
|  <p>Chemical structure of M444242: A benzyl group is attached to a chiral center (wedge bond) of a 2-hydroxyethylamine derivative. This chiral center is also bonded to a nitrogen atom which is part of a 1,2,4-thiazole ring system. The nitrogen atom of the 2-hydroxyethylamine derivative is also bonded to a carbonyl group.</p>                                                                                                                                        | 9.15 |

|                                                                                                    |      |
|----------------------------------------------------------------------------------------------------|------|
| 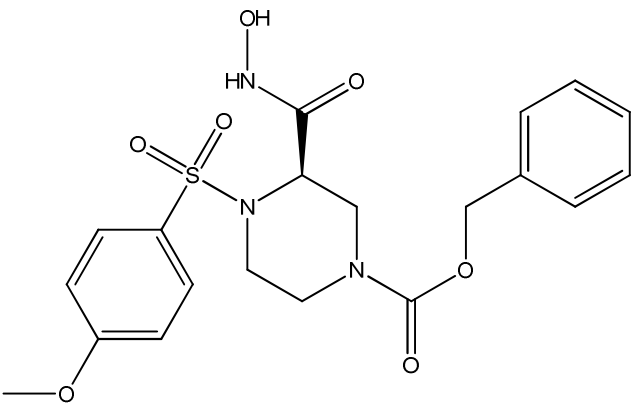 <p>M444253</p>   | 8.88 |
|  <p>M444260</p>  | 8.74 |
|  <p>M444225</p> | 8.73 |

|                                                                                                    |      |
|----------------------------------------------------------------------------------------------------|------|
| 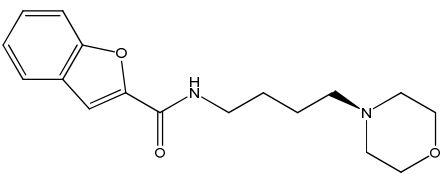 <p>M233105</p>   | 8.51 |
|  <p>M444237</p>   | 8.29 |
|  <p>M444280</p> | 7.12 |

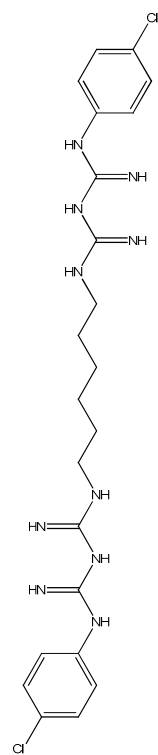

M220557

6.78

|                                                                                                    |      |
|----------------------------------------------------------------------------------------------------|------|
| 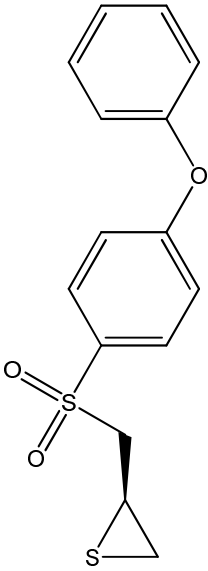 <p>M444274</p>   | 5.41 |
|  <p>M682300</p> | 4.71 |



Table S2. *In vitro* assay data for the top five anthrax toxin LF inhibitor hit compounds: **5426202**, **5421384**, **5428736**, **5426345**, and **150002740**

(a) **5426202**

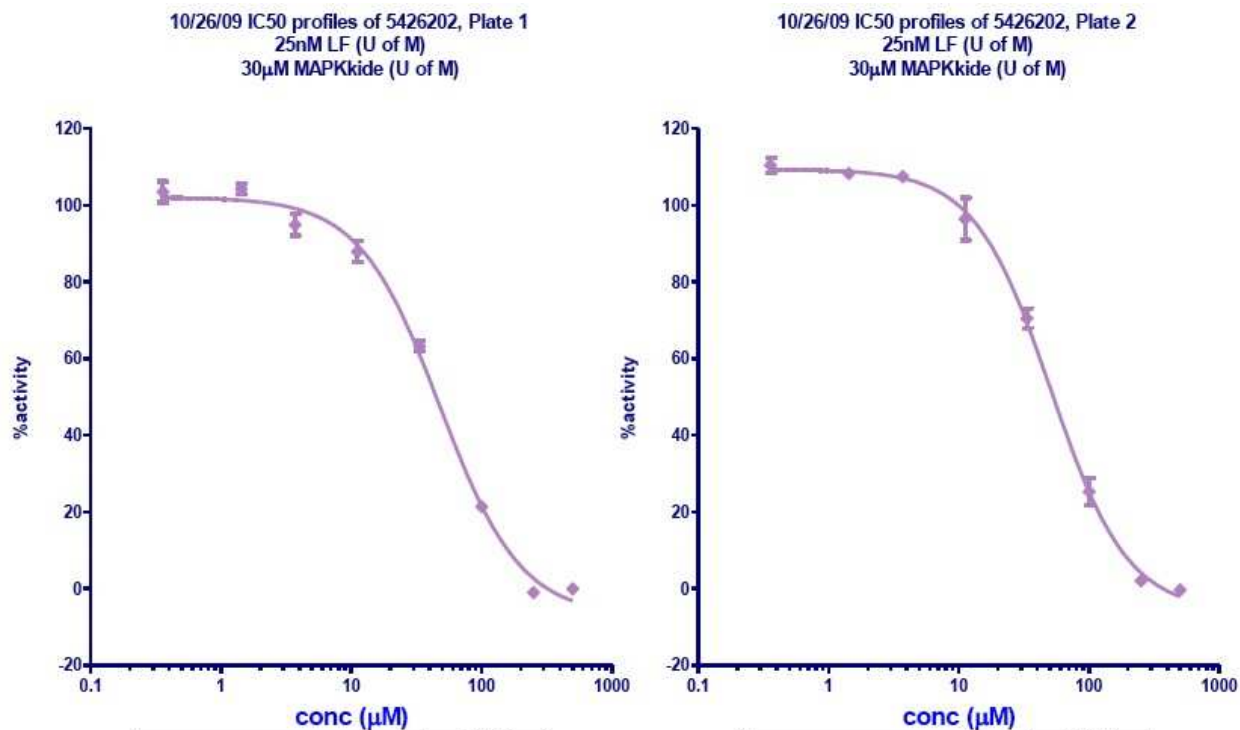

| log(inhibitor) vs. response – Variable slope |  | 5426202          |
|----------------------------------------------|--|------------------|
| Best-fit values                              |  |                  |
| BOTTOM                                       |  | -7.064           |
| TOP                                          |  | 102.1            |
| LOGIC50                                      |  | 1.681            |
| HILLSLOPE                                    |  | -1.403           |
| IC50                                         |  | 47.99            |
| Span                                         |  | 109.1            |
| Std. Error                                   |  |                  |
| BOTTOM                                       |  | 3.820            |
| TOP                                          |  | 1.803            |
| LOGIC50                                      |  | 0.03808          |
| HILLSLOPE                                    |  | 0.1535           |
| Span                                         |  | 4.506            |
| 95% Confidence Intervals                     |  |                  |
| BOTTOM                                       |  | -14.94 to 0.8345 |
| TOP                                          |  | 88.16 to 106.0   |
| LOGIC50                                      |  | 1.568 to 1.764   |
| HILLSLOPE                                    |  | -1.737 to -1.068 |
| IC50                                         |  | 39.64 to 58.09   |
| Span                                         |  | 99.32 to 119.0   |
| Goodness of Fit                              |  |                  |
| Degrees of Freedom                           |  | 12               |
| R <sup>2</sup>                               |  | 0.9940           |
| Absolute Sum of Squares                      |  | 176.0            |
| Sy.x                                         |  | 3.830            |
| Number of points                             |  |                  |
| Analyzed                                     |  | 16               |

| log(inhibitor) vs. response – Variable slope |  | 5426202          |
|----------------------------------------------|--|------------------|
| Best-fit values                              |  |                  |
| BOTTOM                                       |  | -5.783           |
| TOP                                          |  | 109.4            |
| LOGIC50                                      |  | 1.708            |
| HILLSLOPE                                    |  | -1.480           |
| IC50                                         |  | 51.00            |
| Span                                         |  | 115.2            |
| Std. Error                                   |  |                  |
| BOTTOM                                       |  | 3.092            |
| TOP                                          |  | 1.523            |
| LOGIC50                                      |  | 0.03024          |
| HILLSLOPE                                    |  | 0.1333           |
| Span                                         |  | 3.806            |
| 95% Confidence Intervals                     |  |                  |
| BOTTOM                                       |  | -12.52 to 0.9550 |
| TOP                                          |  | 106.1 to 112.7   |
| LOGIC50                                      |  | 1.842 to 1.774   |
| HILLSLOPE                                    |  | -1.770 to -1.189 |
| IC50                                         |  | 43.82 to 59.36   |
| Span                                         |  | 106.9 to 123.5   |
| Goodness of Fit                              |  |                  |
| Degrees of Freedom                           |  | 12               |
| R <sup>2</sup>                               |  | 0.9959           |
| Absolute Sum of Squares                      |  | 137.0            |
| Sy.x                                         |  | 3.379            |
| Number of points                             |  |                  |
| Analyzed                                     |  | 16               |

## (b) 5421384

10/26/09 IC50 profile of 5421384, Plate 1  
25nM LF (U of M)  
30 $\mu$ M MAPKkide (U of M)

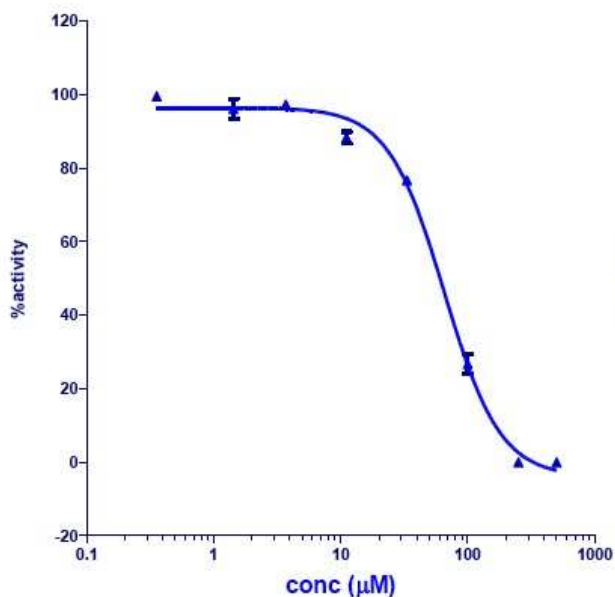

| 5421384                                       |                  |
|-----------------------------------------------|------------------|
| log(inhibitor) vs. response -- Variable slope |                  |
| Best-fit values                               |                  |
| BOTTOM                                        | -4.001           |
| TOP                                           | 96.49            |
| LOGIC50                                       | 1.816            |
| HILLSLOPE                                     | -1.972           |
| IC50                                          | 65.52            |
| Span                                          | 100.5            |
| Std. Error                                    |                  |
| BOTTOM                                        | 2.551            |
| TOP                                           | 1.325            |
| LOGIC50                                       | 0.02656          |
| HILLSLOPE                                     | 0.1891           |
| Span                                          | 3.055            |
| 95% Confidence Intervals                      |                  |
| BOTTOM                                        | -9.561 to 1.558  |
| TOP                                           | 93.60 to 99.37   |
| LOGIC50                                       | 1.758 to 1.874   |
| HILLSLOPE                                     | -2.384 to -1.560 |
| IC50                                          | 57.34 to 74.86   |
| Span                                          | 93.83 to 107.1   |
| Goodness of Fit                               |                  |
| Degrees of Freedom                            | 12               |
| R <sup>2</sup>                                | 0.9949           |
| Absolute Sum of Squares                       | 140.3            |
| Sy.x                                          | 3.419            |
| Number of points                              |                  |
| Analyzed                                      | 16               |

10/26/09 IC50 profile of 5421384, Plate 2  
25nM LF (U of M)  
30 $\mu$ M MAPKkide (U of M)

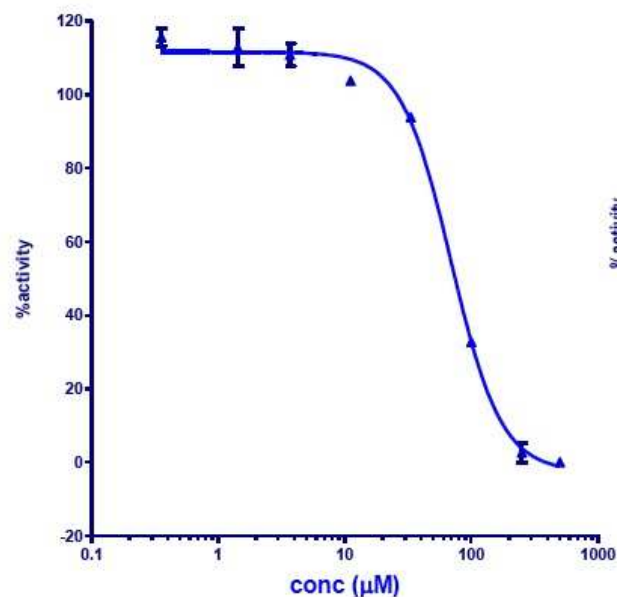

| 5421384                                       |                  |
|-----------------------------------------------|------------------|
| log(inhibitor) vs. response -- Variable slope |                  |
| Best-fit values                               |                  |
| BOTTOM                                        | -2.577           |
| TOP                                           | 111.6            |
| LOGIC50                                       | 1.842            |
| HILLSLOPE                                     | -2.197           |
| IC50                                          | 69.44            |
| Span                                          | 114.2            |
| Std. Error                                    |                  |
| BOTTOM                                        | 2.914            |
| TOP                                           | 1.590            |
| LOGIC50                                       | 0.02613          |
| HILLSLOPE                                     | 0.2289           |
| Span                                          | 3.503            |
| 95% Confidence Intervals                      |                  |
| BOTTOM                                        | -8.927 to 3.774  |
| TOP                                           | 108.2 to 115.1   |
| LOGIC50                                       | 1.785 to 1.899   |
| HILLSLOPE                                     | -2.895 to -1.698 |
| IC50                                          | 60.91 to 79.16   |
| Span                                          | 106.6 to 121.9   |
| Goodness of Fit                               |                  |
| Degrees of Freedom                            | 12               |
| R <sup>2</sup>                                | 0.9941           |
| Absolute Sum of Squares                       | 214.1            |
| Sy.x                                          | 4.224            |
| Number of points                              |                  |
| Analyzed                                      | 16               |

(c) 5428736

10/26/09 IC50 profile of 5428736, Plate 1  
25nM LF (U of M)  
30 $\mu$ M MAPKkide (U of M)

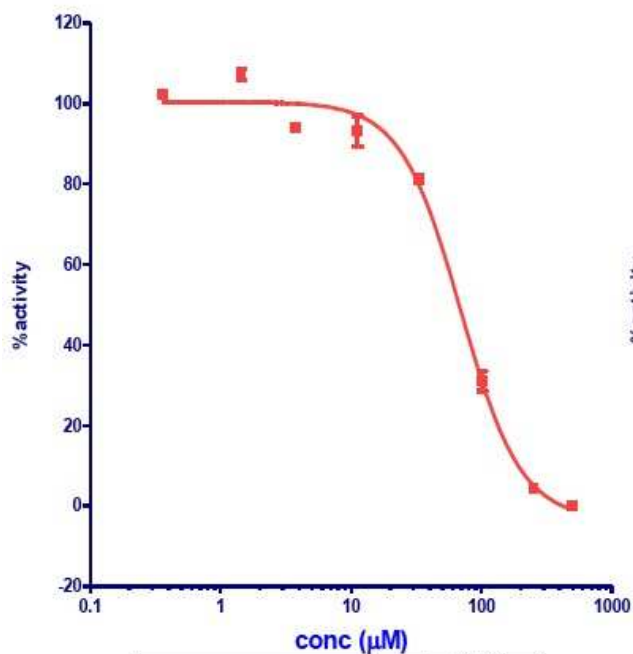

| 5428736                                       |                  |
|-----------------------------------------------|------------------|
| log(inhibitor) vs. response -- Variable slope |                  |
| Best-fit values                               |                  |
| BOTTOM                                        | -3.350           |
| TOP                                           | 100.3            |
| LOGIC50                                       | 1.842            |
| HILLSLOPE                                     | -1.887           |
| IC50                                          | 89.43            |
| Span                                          | 103.7            |
| Std. Error                                    |                  |
| BOTTOM                                        | 3.759            |
| TOP                                           | 1.817            |
| LOGIC50                                       | 0.03662          |
| HILLSLOPE                                     | 0.2466           |
| Span                                          | 4.463            |
| 95% Confidence Intervals                      |                  |
| BOTTOM                                        | -11.54 to 4.841  |
| TOP                                           | 96.39 to 104.3   |
| LOGIC50                                       | 1.762 to 1.921   |
| HILLSLOPE                                     | -2.425 to -1.350 |
| IC50                                          | 57.77 to 83.43   |
| Span                                          | 93.97 to 113.4   |
| Goodness of Fit                               |                  |
| Degrees of Freedom                            | 12               |
| R <sup>2</sup>                                | 0.9908           |
| Absolute Sum of Squares                       | 259.4            |
| Sy,x                                          | 4.649            |
| Number of points                              |                  |
| Analyzed                                      | 16               |

10/26/09 IC50 profile of 5428736, Plate 2  
25nM LF (U of M)  
30 $\mu$ M MAPKkide (U of M)

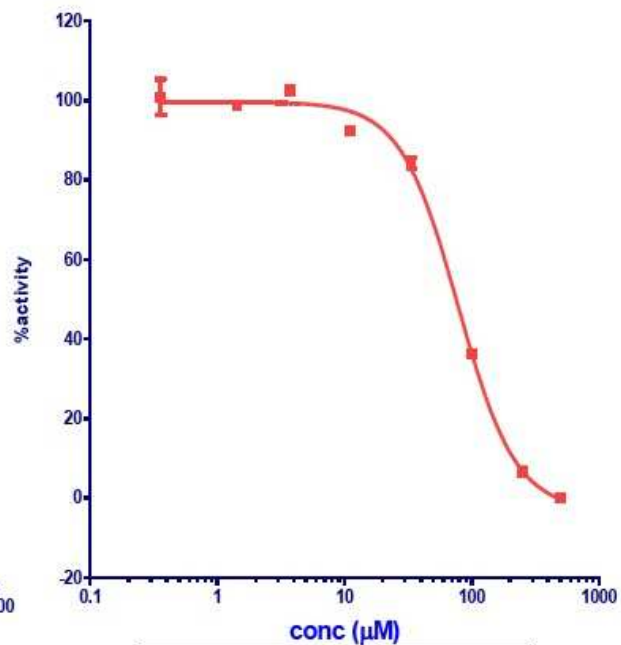

| 5428736                                       |                  |
|-----------------------------------------------|------------------|
| log(inhibitor) vs. response -- Variable slope |                  |
| Best-fit values                               |                  |
| BOTTOM                                        | -3.124           |
| TOP                                           | 99.80            |
| LOGIC50                                       | 1.894            |
| HILLSLOPE                                     | -1.919           |
| IC50                                          | 78.34            |
| Span                                          | 102.7            |
| Std. Error                                    |                  |
| BOTTOM                                        | 2.772            |
| TOP                                           | 1.240            |
| LOGIC50                                       | 0.02526          |
| HILLSLOPE                                     | 0.1852           |
| Span                                          | 3.256            |
| 95% Confidence Intervals                      |                  |
| BOTTOM                                        | -9.164 to 2.918  |
| TOP                                           | 96.90 to 102.3   |
| LOGIC50                                       | 1.839 to 1.949   |
| HILLSLOPE                                     | -2.323 to -1.518 |
| IC50                                          | 69.02 to 88.93   |
| Span                                          | 95.83 to 109.8   |
| Goodness of Fit                               |                  |
| Degrees of Freedom                            | 12               |
| R <sup>2</sup>                                | 0.9954           |
| Absolute Sum of Squares                       | 124.2            |
| Sy,x                                          | 3.217            |
| Number of points                              |                  |
| Analyzed                                      | 16               |

(d) 5426345

10/26/09 IC50 profile of 5426345, Plate 1  
25nM LF (U of M)  
30 $\mu$ M MAPKkide (U of M)

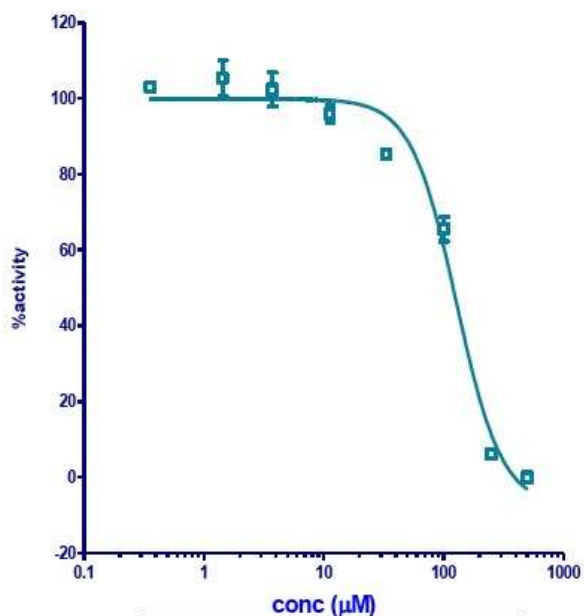

| log(inhibitor) vs. response -- Variable slope |  | 5426345          |
|-----------------------------------------------|--|------------------|
| Best-fit values                               |  |                  |
| BOTTOM                                        |  | -7.603           |
| TOP                                           |  | 99.89            |
| LOGIC50                                       |  | 2.107            |
| HILLSLOPE                                     |  | -2.303           |
| IC50                                          |  | 128.0            |
| Span                                          |  | 107.5            |
| Std. Error                                    |  |                  |
| BOTTOM                                        |  | 8.052            |
| TOP                                           |  | 2.328            |
| LOGIC50                                       |  | 0.05219          |
| HILLSLOPE                                     |  | 0.5589           |
| Span                                          |  | 8.804            |
| 95% Confidence Intervals                      |  |                  |
| BOTTOM                                        |  | -25.15 to 9.942  |
| TOP                                           |  | 94.82 to 105.0   |
| LOGIC50                                       |  | 1.993 to 2.221   |
| HILLSLOPE                                     |  | -3.517 to -1.090 |
| IC50                                          |  | 98.49 to 186.3   |
| Span                                          |  | 88.31 to 126.7   |
| Goodness of Fit                               |  |                  |
| Degrees of Freedom                            |  | 12               |
| R <sup>2</sup>                                |  | 0.9795           |
| Absolute Sum of Squares                       |  | 546.8            |
| Sy.x                                          |  | 6.751            |
| Number of points                              |  |                  |
| Analyzed                                      |  | 16               |

10/26/09 IC50 profile of 5426345, Plate 2  
25nM LF (U of M)  
30 $\mu$ M MAPKkide (U of M)

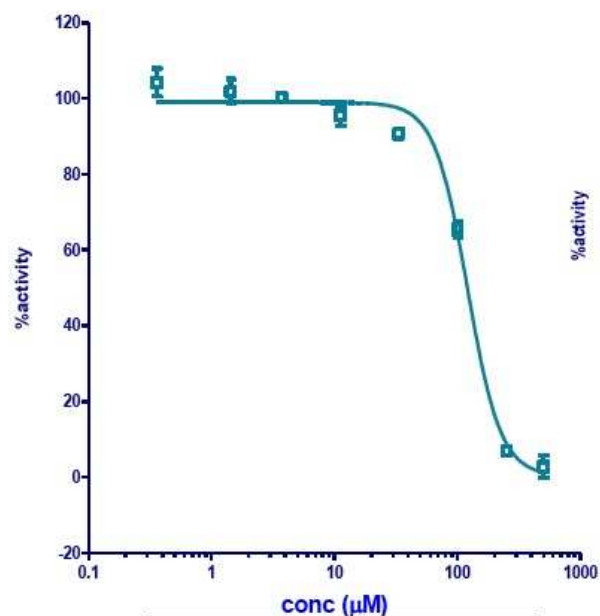

| log(inhibitor) vs. response -- Variable slope |  | 5426345          |
|-----------------------------------------------|--|------------------|
| Best-fit values                               |  |                  |
| BOTTOM                                        |  | 0.3556           |
| TOP                                           |  | 98.93            |
| LOGIC50                                       |  | 2.083            |
| HILLSLOPE                                     |  | -3.232           |
| IC50                                          |  | 121.0            |
| Span                                          |  | 98.58            |
| Std. Error                                    |  |                  |
| BOTTOM                                        |  | 4.409            |
| TOP                                           |  | 1.632            |
| LOGIC50                                       |  | 0.03154          |
| HILLSLOPE                                     |  | 0.7570           |
| Span                                          |  | 4.873            |
| 95% Confidence Intervals                      |  |                  |
| BOTTOM                                        |  | -9.251 to 9.962  |
| TOP                                           |  | 95.38 to 102.5   |
| LOGIC50                                       |  | 2.014 to 2.152   |
| HILLSLOPE                                     |  | -4.882 to -1.583 |
| IC50                                          |  | 103.3 to 141.8   |
| Span                                          |  | 87.96 to 109.2   |
| Goodness of Fit                               |  |                  |
| Degrees of Freedom                            |  | 12               |
| R <sup>2</sup>                                |  | 0.9882           |
| Absolute Sum of Squares                       |  | 300.6            |
| Sy.x                                          |  | 5.005            |
| Number of points                              |  |                  |
| Analyzed                                      |  | 16               |

(e) 150002740

10/26/09 IC50 profile of 150002740, Plate 1  
25nM LF (U of M)  
30µM MAPKkide (U of M)

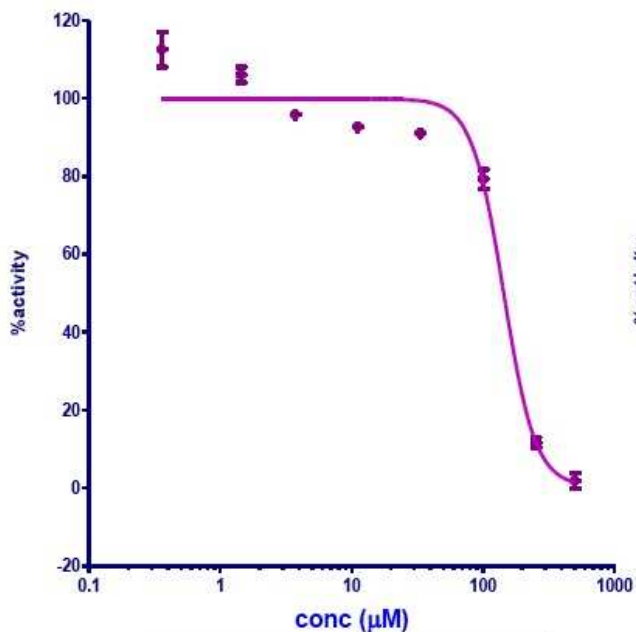

| 150002740                                     |                  |
|-----------------------------------------------|------------------|
| log(inhibitor) vs. response -- Variable slope |                  |
| Best-fit values                               |                  |
| BOTTOM                                        | 0.3906           |
| TOP                                           | 99.92            |
| LOGIC50                                       | 2.157            |
| HILLSLOPE                                     | -3.613           |
| IC50                                          | 143.7            |
| Span                                          | 99.53            |
| Std. Error                                    |                  |
| BOTTOM                                        | 6.733            |
| TOP                                           | 2.518            |
| LOGIC50                                       | 0.05130          |
| HILLSLOPE                                     | 0.9423           |
| Span                                          | 7.283            |
| 95% Confidence Intervals                      |                  |
| BOTTOM                                        | -14.28 to 15.08  |
| TOP                                           | 94.43 to 105.4   |
| LOGIC50                                       | 2.046 to 2.269   |
| HILLSLOPE                                     | -5.666 to -1.559 |
| IC50                                          | 111.1 to 185.9   |
| Span                                          | 83.66 to 115.4   |
| Goodness of Fit                               |                  |
| Degrees of Freedom                            | 12               |
| R <sup>2</sup>                                | 0.9710           |
| Absolute Sum of Squares                       | 743.3            |
| Sy,x                                          | 7.870            |
| Number of points                              |                  |
| Analyzed                                      | 16               |

10/26/09 IC50 profile of 150002740, Plate 2  
25nM LF (U of M)  
30µM MAPKkide (U of M)

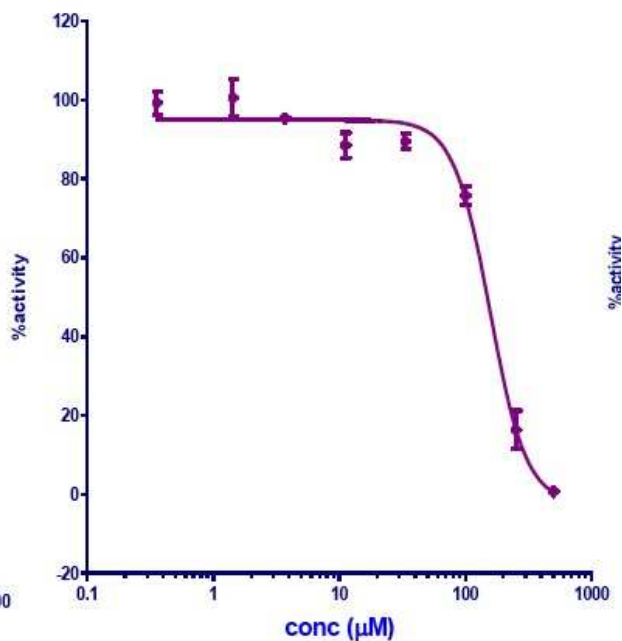

| 150002740                                     |                  |
|-----------------------------------------------|------------------|
| log(inhibitor) vs. response -- Variable slope |                  |
| Best-fit values                               |                  |
| BOTTOM                                        | -2.257           |
| TOP                                           | 94.95            |
| LOGIC50                                       | 2.196            |
| HILLSLOPE                                     | -3.023           |
| IC50                                          | 167.0            |
| Span                                          | 97.21            |
| Std. Error                                    |                  |
| BOTTOM                                        | 5.830            |
| TOP                                           | 1.816            |
| LOGIC50                                       | 0.03956          |
| HILLSLOPE                                     | 0.5279           |
| Span                                          | 6.036            |
| 95% Confidence Intervals                      |                  |
| BOTTOM                                        | -14.52 to 10.01  |
| TOP                                           | 91.00 to 98.91   |
| LOGIC50                                       | 2.110 to 2.282   |
| HILLSLOPE                                     | -4.173 to -1.873 |
| IC50                                          | 128.7 to 191.4   |
| Span                                          | 84.05 to 110.4   |
| Goodness of Fit                               |                  |
| Degrees of Freedom                            | 12               |
| R <sup>2</sup>                                | 0.9827           |
| Absolute Sum of Squares                       | 378.4            |
| Sy,x                                          | 5.615            |
| Number of points                              |                  |
| Analyzed                                      | 16               |

Table S3. *In vitro* assay data for two matrix metalloproteinase inhibitors active against the anthrax toxin lethal factor: **GM6001** and **M444264**

(a) **GM6001**

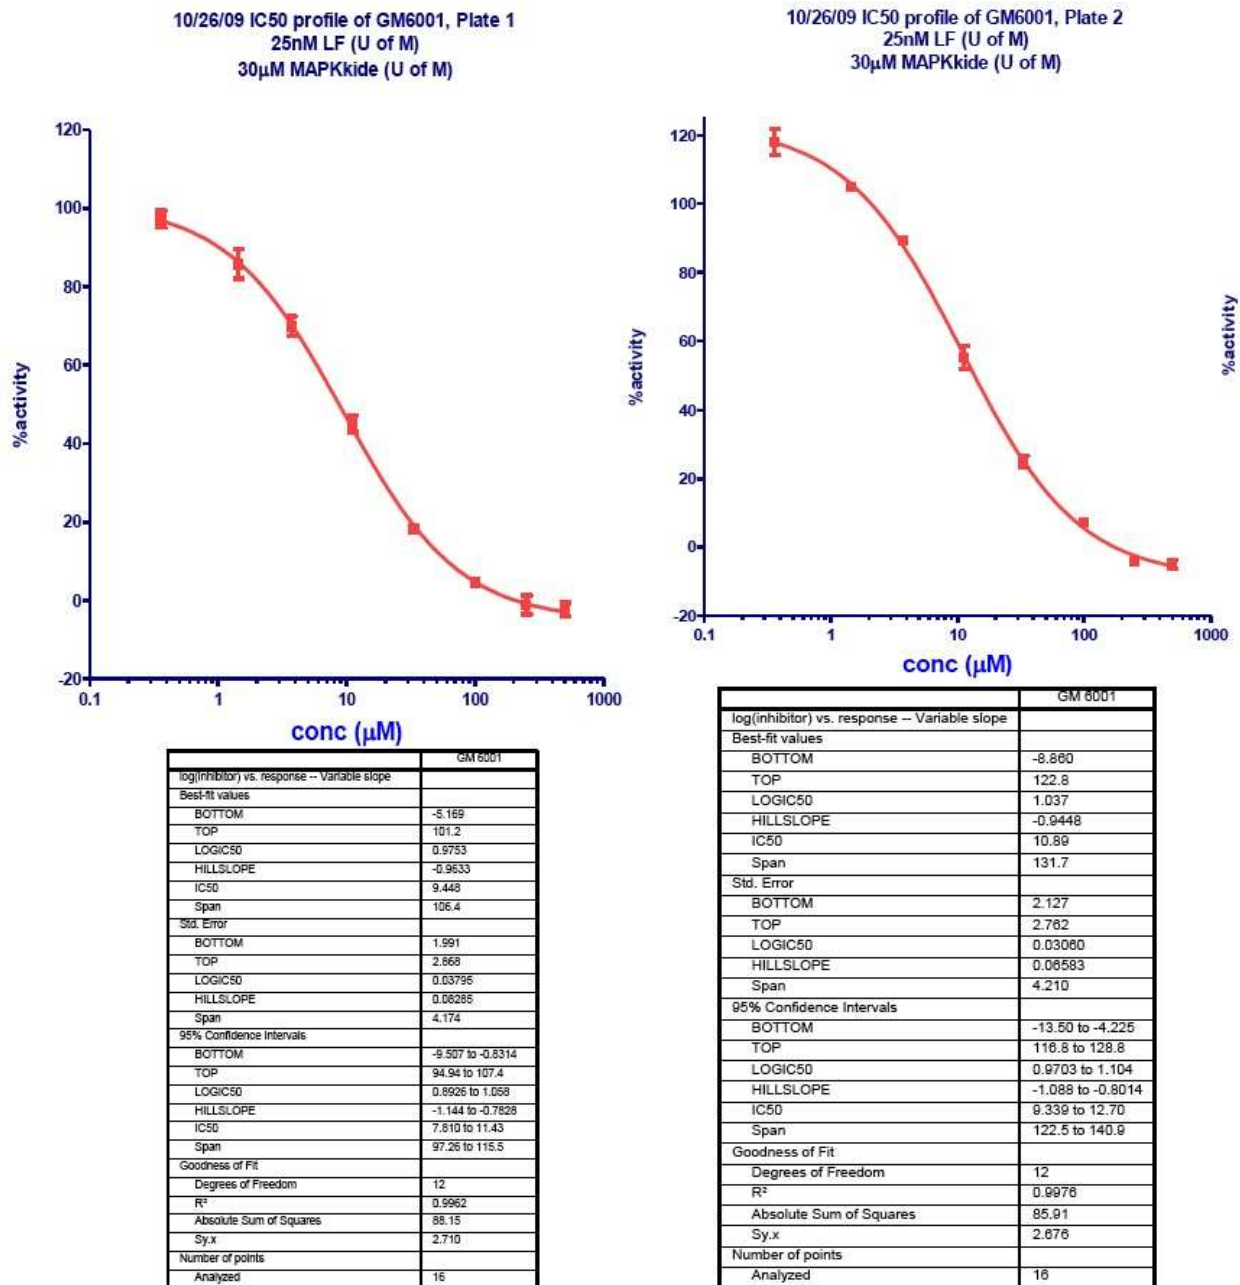

## (b) M444264

10/29/09 IC50 profile of M444264, Set 1 (n = 2)  
25nM LF (U of M)  
30 $\mu$ M MAPKkide (U of M)

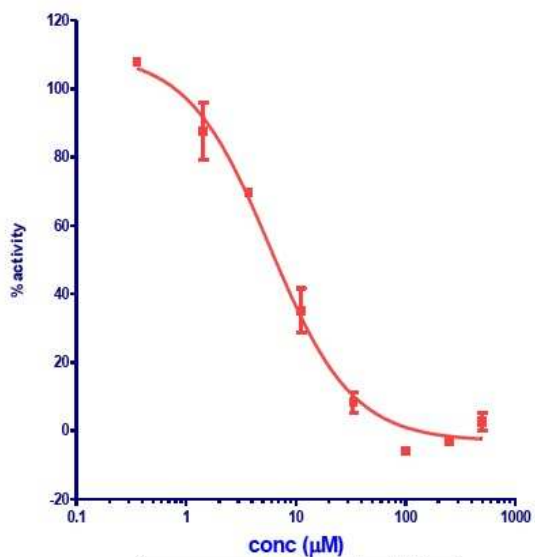

| log(Inhibitor) vs. response - Variable slope |  | M444264           |
|----------------------------------------------|--|-------------------|
| Best-fit values                              |  |                   |
| BOTTOM                                       |  | -3.066            |
| TOP                                          |  | 110.3             |
| LOGIC50                                      |  | 0.7651            |
| HILLSLOPE                                    |  | -1.155            |
| IC50                                         |  | 5.822             |
| Span                                         |  | 113.4             |
| Std. Error                                   |  |                   |
| BOTTOM                                       |  | 3.309             |
| TOP                                          |  | 6.252             |
| LOGIC50                                      |  | 0.06919           |
| HILLSLOPE                                    |  | 0.1914            |
| Span                                         |  | 7.929             |
| 95% Confidence Intervals                     |  |                   |
| BOTTOM                                       |  | -10.35 to 4.216   |
| TOP                                          |  | 96.55 to 124.1    |
| LOGIC50                                      |  | 0.6128 to 0.9174  |
| HILLSLOPE                                    |  | -1.576 to -0.7338 |
| IC50                                         |  | 4.100 to 8.267    |
| Span                                         |  | 95.91 to 130.5    |
| Goodness of Fit                              |  |                   |
| Degrees of Freedom                           |  | 11                |
| R <sup>2</sup>                               |  | 0.9842            |
| Absolute Sum of Squares                      |  | 418.5             |
| Sy.x                                         |  | 6.169             |
| Number of points                             |  | 15                |
| Analyzed                                     |  | 15                |

10/29/09 IC50 profile of M444264, Set 2 (n = 2)  
25nM LF (U of M)  
30 $\mu$ M MAPKkide (U of M)

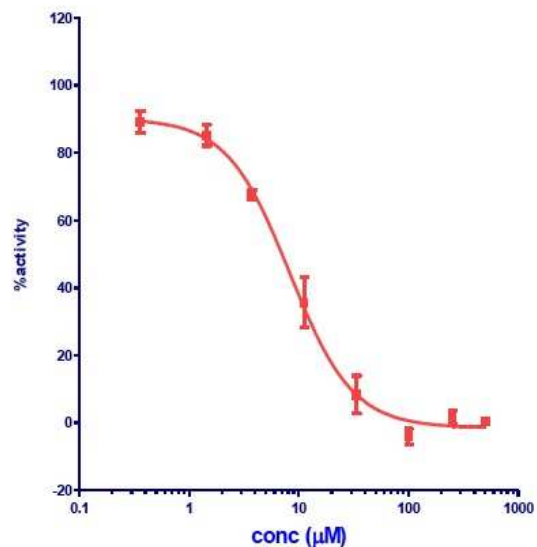

| log(Inhibitor) vs. response - Variable slope |  | M444264          |
|----------------------------------------------|--|------------------|
| Best-fit values                              |  |                  |
| BOTTOM                                       |  | -1.434           |
| TOP                                          |  | 90.15            |
| LOGIC50                                      |  | 0.9182           |
| HILLSLOPE                                    |  | -1.517           |
| IC50                                         |  | 8.283            |
| Span                                         |  | 91.58            |
| Std. Error                                   |  |                  |
| BOTTOM                                       |  | 2.305            |
| TOP                                          |  | 3.521            |
| LOGIC50                                      |  | 0.04993          |
| HILLSLOPE                                    |  | 0.2334           |
| Span                                         |  | 4.610            |
| 95% Confidence Intervals                     |  |                  |
| BOTTOM                                       |  | -6.457 to 3.589  |
| TOP                                          |  | 82.47 to 97.82   |
| LOGIC50                                      |  | 0.8096 to 1.027  |
| HILLSLOPE                                    |  | -2.026 to -1.009 |
| IC50                                         |  | 5.450 to 10.63   |
| Span                                         |  | 81.53 to 101.6   |
| Goodness of Fit                              |  |                  |
| Degrees of Freedom                           |  | 12               |
| R <sup>2</sup>                               |  | 0.9663           |
| Absolute Sum of Squares                      |  | 307.1            |
| Sy.x                                         |  | 5.059            |
| Number of points                             |  | 15               |
| Analyzed                                     |  | 15               |

Table S4. Identity and purity analysis data for the top three anthrax toxin LF inhibitor hit compounds: **5426202**, **5421384**, and **5428736**

(a) **5426202**

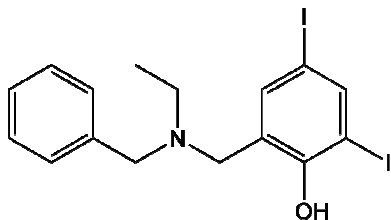

Chemical Formula:  $C_{16}H_{17}I_2NO$

Exact Mass: 492.9400

Purity >95%

Predicted  $^1H$  NMR spectrum:

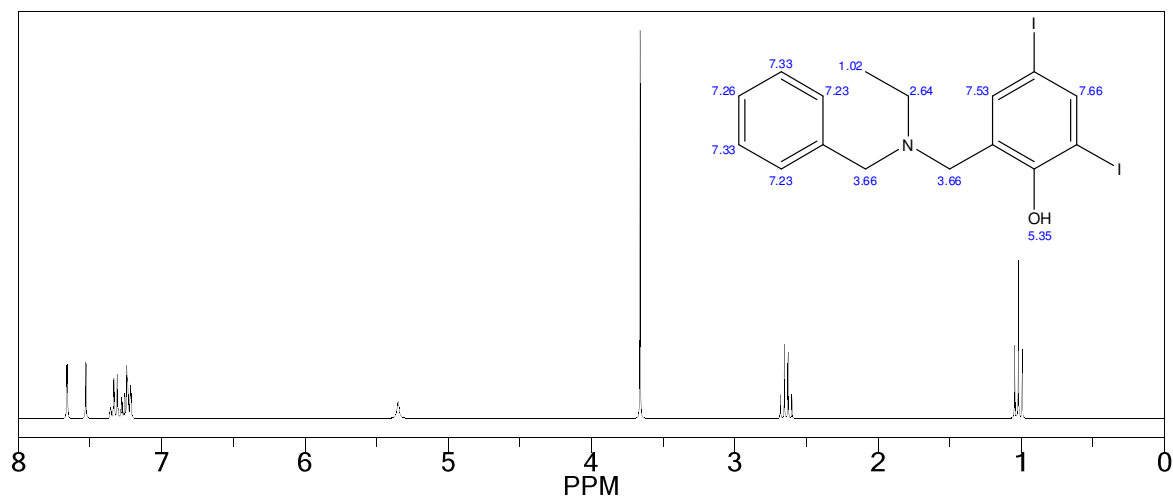



Observed  $^1\text{H}$  NMR spectrum:

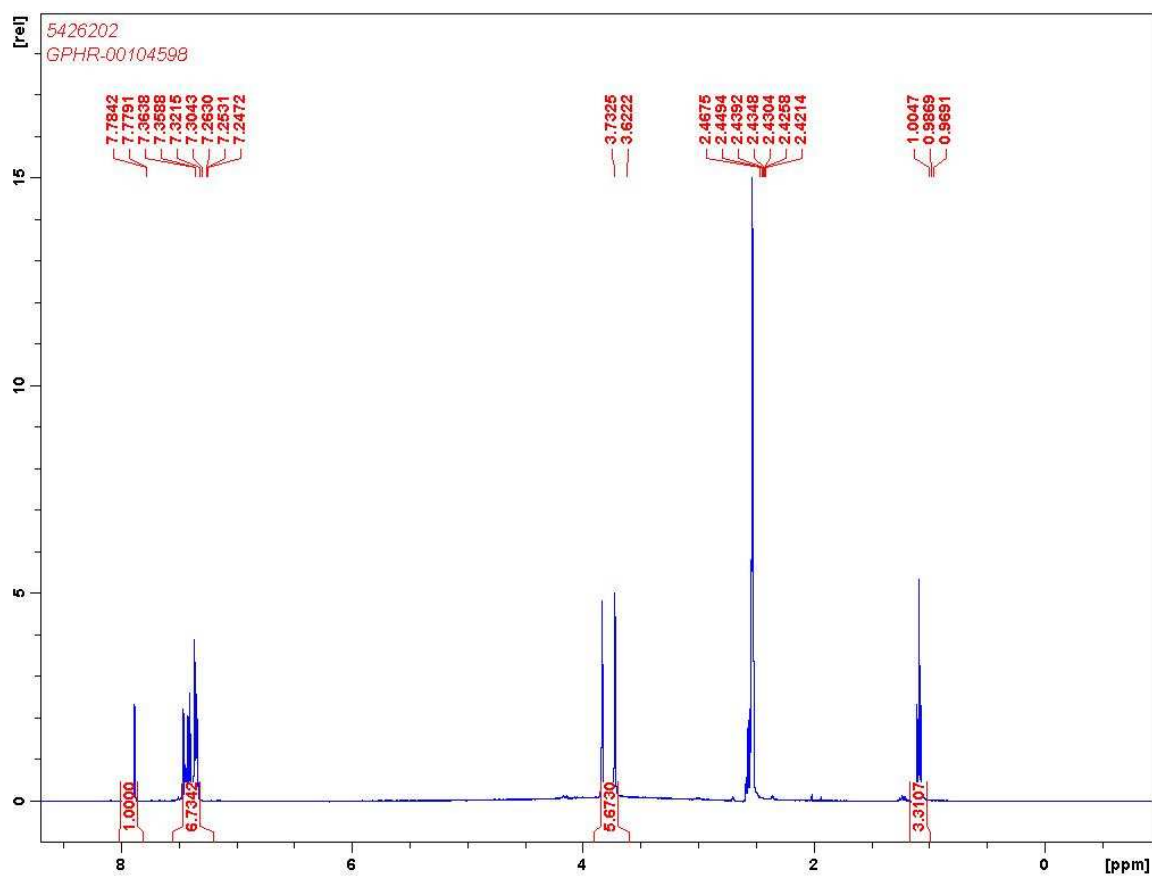

LC-MS:

Sample 12 Vial 2:8 ID File GPHR-00104598 Date 21-Jul-2009 Time 16:59:41 Description 5426202

PDA Ch3 220nm@1.2nm-MBF Smooth (SG, 2x2)

(5) 1.517  
494.08  
3.41 Range: 1.517

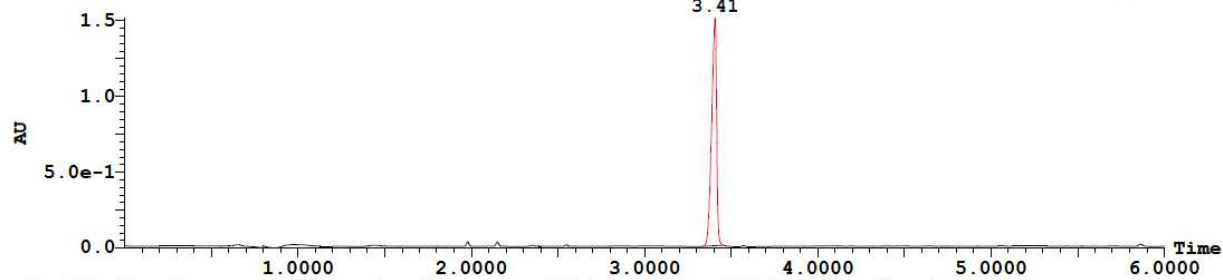

| Peak Number | Compound | Time | AreaAbs  | Area %Total | Width | Height | Mass Found |
|-------------|----------|------|----------|-------------|-------|--------|------------|
| 5           |          | 3.41 | 4.99e+04 | 100.00      | 0     | 2e+06  |            |

(b) 5421384

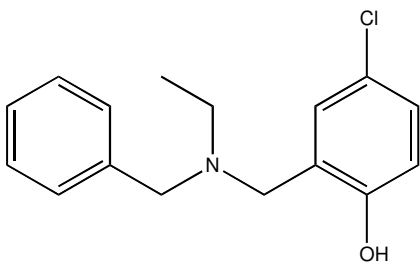Chemical Formula:  $C_{16}H_{18}ClNO$ 

Exact Mass: 275.1077

Purity: &gt;95%

Predicted  $^1H$  NMR spectrum: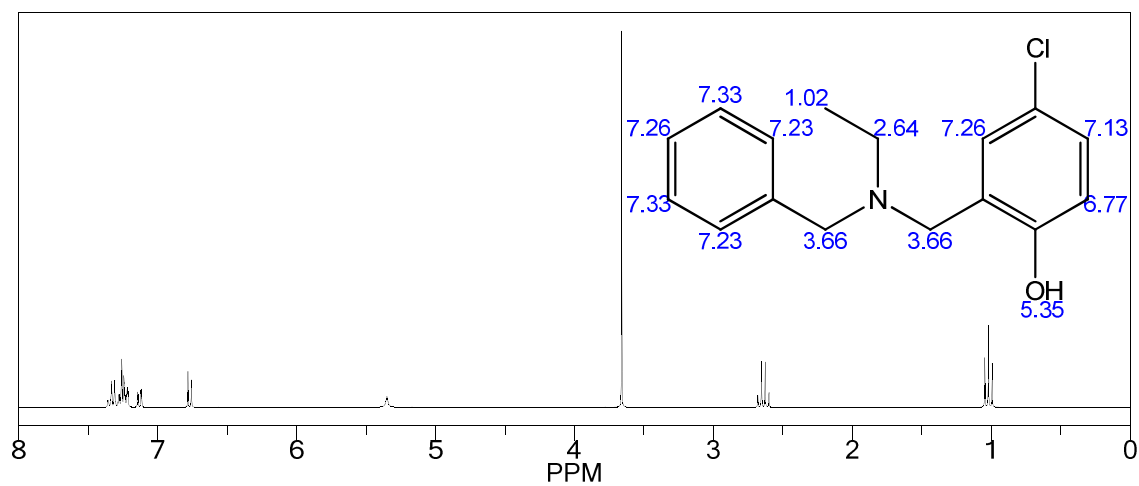

Observed  $^1\text{H}$  NMR spectrum:

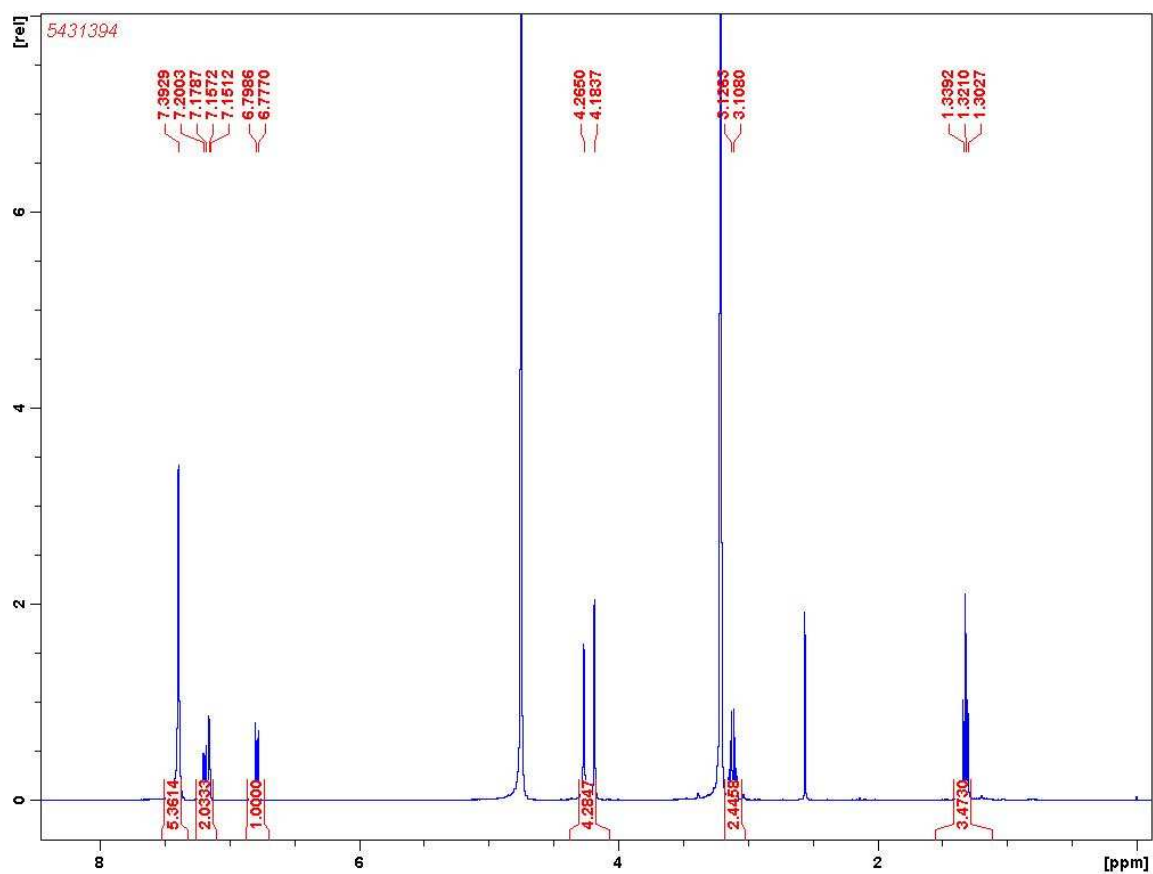

LC-MS:

Sample 5 Vial 1:13 ID File 5421384\_2 Date 30-Oct-2009 Time 16:31:29 Description

PDA Ch4 220nm@1.2nm-MBF Smooth (SG, 2x2)

(2)

6.259e-1

Range: 6.259e-1

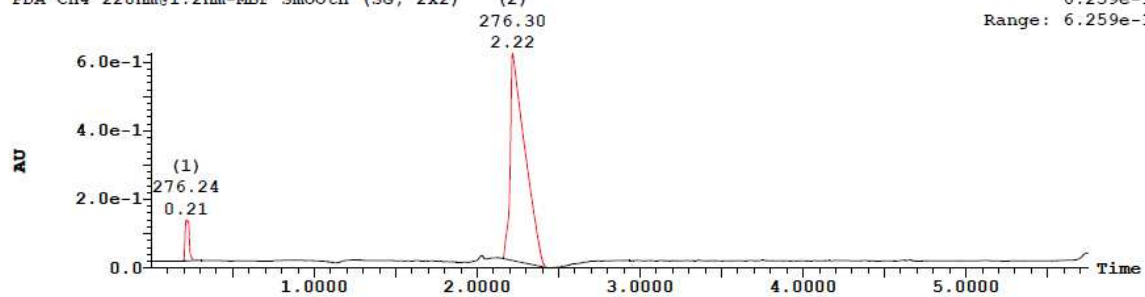

| Peak Number | Compound | Time | AreaAbs   | Area %Total | Width | Height | Mass Found |
|-------------|----------|------|-----------|-------------|-------|--------|------------|
| 1           |          | 0.21 | 3.56e+003 | 5.28        | 0     | 1e+005 |            |
| 2           |          | 2.22 | 6.39e+004 | 94.72       | 0     | 6e+005 |            |

(c) 5428736

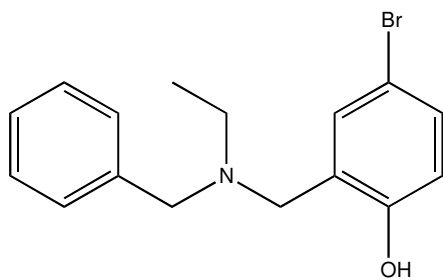Chemical Formula:  $C_{16}H_{18}BrNO$ 

Exact Mass: 319.0572

Purity: &gt;95%

Predicted  $^1H$  NMR spectrum: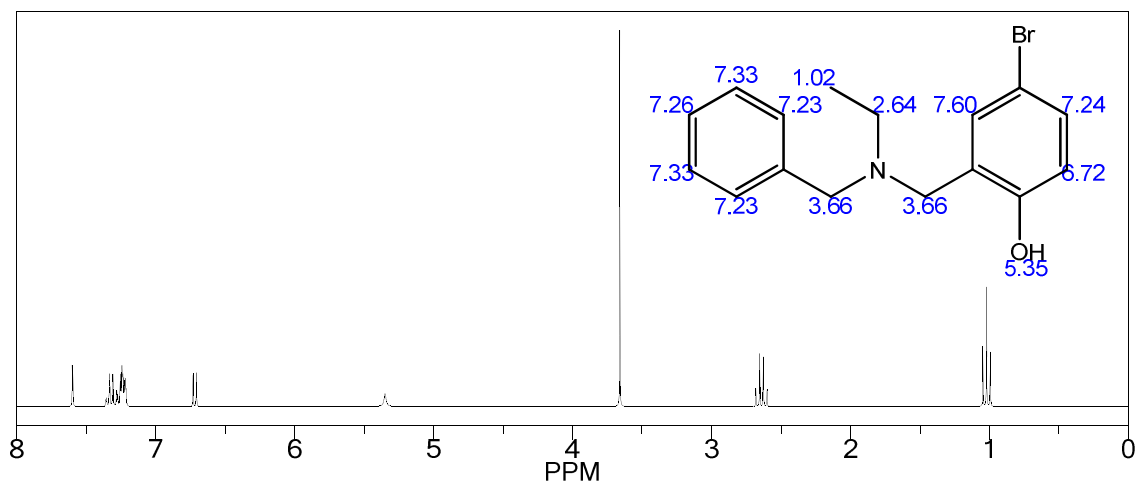

Observed  $^1\text{H}$  NMR spectrum:

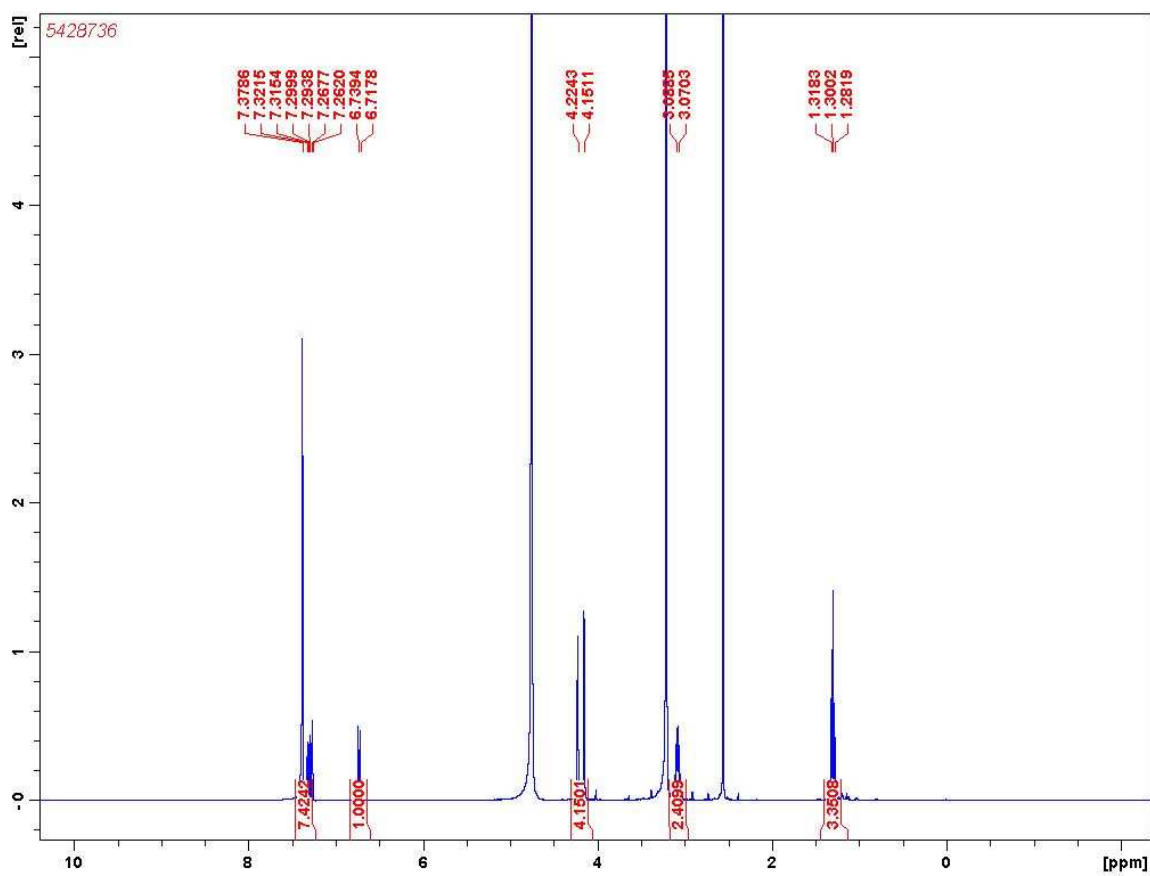

LC-MS:

PDA Ch4 220nm@1.2nm-MBF Smooth (SG, 2x2)

1.033

Range: 1.033

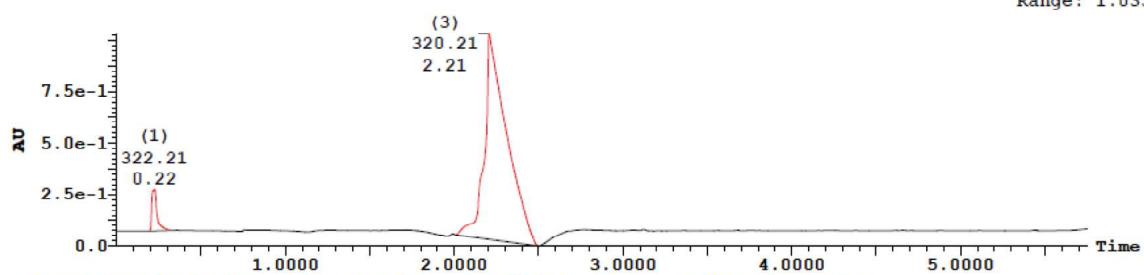

| Peak Number | Compound | Time | AreaAbs   | Area %Total | Width | Height | Mass Found |
|-------------|----------|------|-----------|-------------|-------|--------|------------|
| 1           |          | 0.22 | 7.51e+003 | 4.65        | 0     | 2e+005 |            |
| 3           |          | 2.21 | 1.54e+005 | 95.35       | 0     | 1e+006 |            |

LC-MS solvent gradient table:

| Time (min) | Flow rate (mL/min) | % solvent A | % solvent B |
|------------|--------------------|-------------|-------------|
| Initial    | 0.25               | 95          | 5           |
| 5          | 0.25               | 5           | 95          |
| 5.5        | 0.25               | 5           | 95          |
| 6          | 0.25               | 95          | 5           |
| 6.25       | 0.25               | 95          | 5           |

Solvent A: 95:5 water:acetonitrile with 0.1% formic acid

Solvent B: 95:5 acetonitrile:water with 0.1% formic acid
